# Supplementary material for: Boosting CdS Photocatalytic Activity for Hydrogen Evolution in Formic Acid Solution by P Doping and MoS2 Photodeposition
Source: MDPI journal article supplement (doi:10.3390/nano12030561), 2022-02-06
Supplement: s1 [file s1]

# Boosting CdS Photocatalytic Activity for Hydrogen Evolution in Formic Acid Solution by P Doping and MoS<sub>2</sub> Photodeposition

Junchen Liu <sup>1</sup>, Haoran Huang <sup>1</sup>, Chunyu Ge <sup>1</sup>, Zhenghui Wang <sup>1,\*</sup>, Xunfu Zhou <sup>2,\*</sup> and Yueping Fang <sup>1,3,\*</sup>

<sup>1</sup> Key Laboratory for Biobased Materials and Energy of Ministry of Education, College of Materials and Energy, South China Agricultural University, 483 Wushan Road, Guangzhou 510642, China; exgukon@163.com (J.L.); hhr210527@163.com (H.H.); gcy199991@163.com (C.G.)

<sup>2</sup> School of Chemistry and Chemical Engineering, Lingnan Normal University, Zhanjiang 524048, China

<sup>3</sup> Guangdong Laboratory for Lingnan Modern Agriculture, 483 Wushan Road, Guangzhou 510642, China

\* Correspondence: zhwang@scau.edu.cn (Z.W.); zxf776932260@163.com (X.Z.); ypfang@scau.edu.cn (Y.F.)

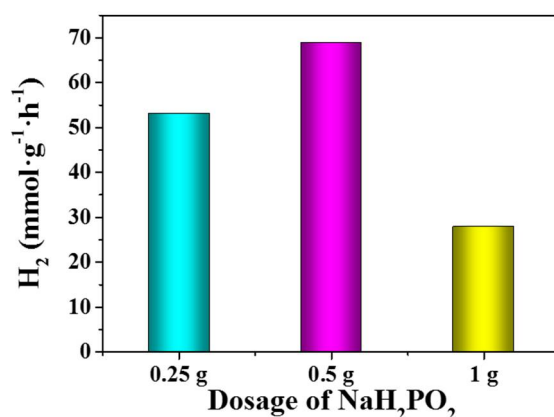

**Figure S1.** The average rate of H<sub>2</sub> evolution over CdS/P/MoS<sub>2</sub> synthesized from different dosage of NaH<sub>2</sub>PO<sub>2</sub>.

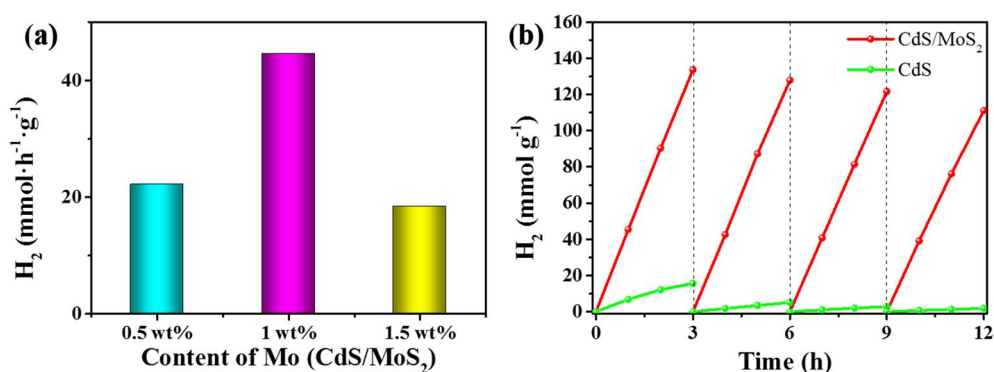

**Figure S2.** The average rate of H<sub>2</sub> evolution over CdS/MoS<sub>2</sub> loaded with different content of Mo. (a) and stability tests of CdS and CdS/MoS<sub>2</sub> (b).

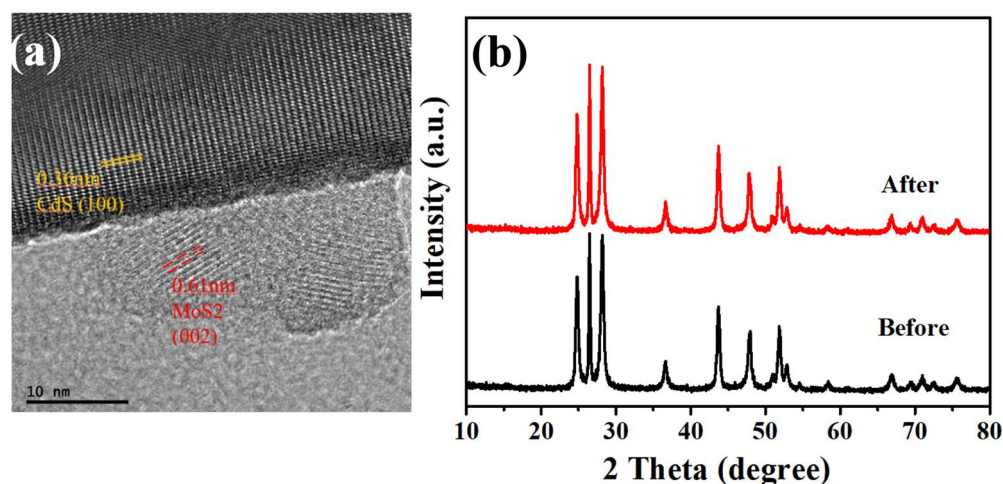

**Figure S3.** The characterization of CdS/P/MoS<sub>2</sub> after recycling tests: (a) HRTEM; (b) XRD.

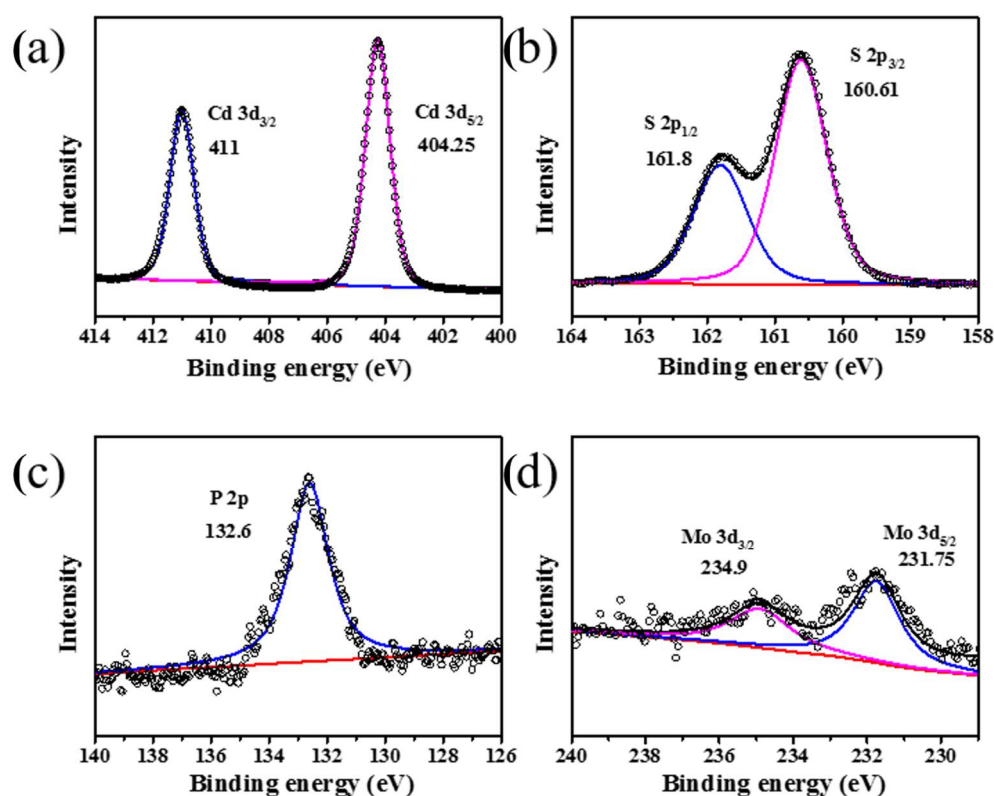

**Figure S4.** the high resolution XPS spectra of CdS/P/MoS<sub>2</sub> after a photocatalytic run: a) Cd 3d; b) S 2p; c) P 2p and d) Mo 3d.

Figure S3a shows the HRTEM image after photocatalytic test for 12 h, and Figure S3b shows the XRD patterns of CdS/P/MoS<sub>2</sub> before and after photocatalytic test for 12 h. As can be seen from Figure S3, the structure of CdS/P/MoS<sub>2</sub> does not change significantly after the photocatalytic reaction. As the figure S4 shows, there are no changes in the surface species of CdS/P/MoS<sub>2</sub> after a photocatalytic run. This phenomenon confirmed that MoS<sub>2</sub> as a cocatalyst can promote the separation and transfer of photogenerated charge carriers and improve the photocatalytic activity.

**Table S1.** Comparison of photocatalytic H<sub>2</sub> production activities over different photocatalyst.

| Photocatalyst                    | Light (nm) | Activity (mmol·g <sup>-1</sup> ·h <sup>-1</sup> ) | Stability (h) | References |
|----------------------------------|------------|---------------------------------------------------|---------------|------------|
| Pt/CdS nanorods                  | >420       | 4.46                                              | >50           | [51]       |
| Pt/CdS/TNT                       | >420       | 4.26                                              | >3            | [52]       |
| Ru/CdS/ZnS nanoparticles         | >420       | 5.85                                              | >40           | [53]       |
| Pd@C <sub>3</sub> N <sub>4</sub> | >400       | 53.4                                              | >6            | [54]       |
| CdS/FeP                          | >420       | 278                                               | >120          | [12]       |
| Co/CdS nanorods                  | >420       | 14.2                                              | >12           | [55]       |
| Ni/CdS nanorods                  | >420       | 22.8                                              | >12           | [55]       |
| Co-Ni/CdS nanorods               | >420       | 32.6                                              | >18           | [55]       |
| CdS/Co-P <sub>3</sub>            | >420       | 102.9                                             | >24           | [6]        |
| TiO <sub>2</sub> /AuPd           | solar      | 17.7                                              | >10           | [56]       |
| NiCoP@CdS nanorods               | >400       | 354                                               | >48           | [57]       |
| CdS/CoP@RGO                      | >420       | 182                                               | >160          | [2]        |
| CdS/P/MoS <sub>2</sub>           | >400       | 68.89                                             | >12           | this work  |

**Table S2.** Exponential decay-fitted parameters of fluorescence lifetime for CdS, CdS/P and CdS/P/MoS<sub>2</sub>.

| Items                             | CdS     | CdS/P   | CdS/P/MoS <sub>2</sub> |
|-----------------------------------|---------|---------|------------------------|
| $\tau_1/\text{ns}$                | 0.8341  | 0.8001  | 0.8272                 |
| $A_1$                             | 251.081 | 228.995 | 154.313                |
| $\tau_2/\text{ns}$                | 9.8339  | 8.2673  | 6.6510                 |
| $A_2$                             | 5.403   | 6.574   | 0.772                  |
| $\tau_{\text{average}}/\text{ns}$ | 2.66    | 2.51    | 1.05                   |

Through double exponential function fitting and calculation, the average fluorescence life of the sample was calculated, as shown in the table S1. The average life of CdS/P/MoS<sub>2</sub> is 1.05 ns, which is much lower than that of CdS/P (2.51 ns) and CdS/P/MoS<sub>2</sub>(2.66ns). This proves that CdS/P/MoS<sub>2</sub> has a higher nonradiative transition rate, which is attributed to the transfer of electrons from CdS/P to MoS<sub>2</sub>.
